# Supplementary material
Source: PubMed Central journal article supplement (PMC3662524)
Supplement: supp_mct084_mct084supp.pdf [file supp_mct084_mct084supp.pdf]

## SUPPLEMENTARY DATA

TABLE S1. Primers and amplification conditions for the three candidate genes in the study.

| Gene ID        | Primer pairs (5' – 3')                          | PCR conditions                                                                               |
|----------------|-------------------------------------------------|----------------------------------------------------------------------------------------------|
| <i>cad</i>     | CCTCTGTTATGTGCAGGGGTTACA<br>CGAAGTGCAACGGCTCTGG | 94°C 4',35*[94°C 30", 61°C 30",<br>72°C 2'],72°C 10',10° ∞<br>94°C 3',10*[94°C 30", 68°C 30" |
| <i>lp3-3</i>   | CCCCCTTCGGAGGTTGTTTA<br>AGCTGCTGCTGCAATCTCCT    | (-0.5°C/cycle), 72°C 1'],<br>30*[94°C 30", 63°C 30", 72°C<br>1'],72°C 10',10° ∞              |
| <i>CCoAOMT</i> | GCAGCAGAAGTGAAGGCTCAGA<br>TCTTCCATCATCGGGGCAATG | 94°C 4',35*[94°C 30", 61°C 30",<br>72°C 2'],72°C 10',10° ∞                                   |

TABLE S2. Diversity parameters for the three candidate genes.  $N$ , number of sequences;  $S$ , number of segregating sites;  $H$ , number of haplotypes;  $H_d$ , haplotypic diversity (Nei, 1987);  $\theta_\pi$ , Nucleotide diversity based on the average number of pairwise differences;  $\theta_s$ , nucleotide diversity based on the number of segregating sites (Watterson, 1975); MFDM  $P$ -value, significance level for  $P < 0.05$ .

| Gene ID        | Ecological region | $N$ | length<br>(bp) | $S$ | $H$ | $H_d$ (s.d.)   | $\theta_\pi$ | $\theta_s$ | Tajima's $D$            | Fu's $D$                | Fu's $F$                | Fu's $F_s$ | MFDM $P$ -value       |
|----------------|-------------------|-----|----------------|-----|-----|----------------|--------------|------------|-------------------------|-------------------------|-------------------------|------------|-----------------------|
| <i>lp3-3</i>   | Esperanza         | 44  | 404            | 6   | 5   | 0,702 (0,038)  | 0,00541      | 0,00344    | 1,4969 <sup>n.s.</sup>  | 0,3453 <sup>n.s.</sup>  | 0,8246 <sup>n.s.</sup>  | 2,207      | 1.000 <sup>n.s.</sup> |
|                | Taburiente        | 48  | 404            | 5   | 4   | 0,611 (0,056)  | 0,00425      | 0,00281    | 1,264 <sup>n.s.</sup>   | 1,1004 <sup>n.s.</sup>  | 1,3465 <sup>n.s.</sup>  | 2,558      | 0.894 <sup>n.s.</sup> |
|                | Guancha           | 48  | 404            | 6   | 5   | 0,698 (0,039)  | 0,00563      | 0,00337    | 1,7187 <sup>n.s.</sup>  | 1,1778 <sup>n.s.</sup>  | 1,5796*                 | 2,511      | 1.000 <sup>n.s.</sup> |
|                | Garafía           | 48  | 404            | 5   | 5   | 0,522 (0,074)  | 0,00384      | 0,00281    | 0,9062 <sup>n.s.</sup>  | 0,144 <sup>n.s.</sup>   | 0,4452 <sup>n.s.</sup>  | 1,123      | 0.681 <sup>n.s.</sup> |
|                | El Hierro         | 48  | 404            | 4   | 3   | 0,465 (0,074)  | 0,00321      | 0,00224    | 0,9893 <sup>n.s.</sup>  | 1,0085 <sup>n.s.</sup>  | 1,1702 <sup>n.s.</sup>  | 2,892      | 0.596 <sup>n.s.</sup> |
|                | Mogán             | 48  | 404            | 5   | 4   | 0,615 (0,0038) | 0,00508      | 0,00281    | 1,9776 <sup>n.s.</sup>  | 0,144 <sup>n.s.</sup>   | 0,8343 <sup>n.s.</sup>  | 3,284      | 1.000 <sup>n.s.</sup> |
|                | Tirma             | 48  | 404            | 6   | 5   | 0,658 (0,041)  | 0,00493      | 0,00337    | 1,1934 <sup>n.s.</sup>  | -0,5283 <sup>n.s.</sup> | 0,0155 <sup>n.s.</sup>  | 1,989      | 0.979 <sup>n.s.</sup> |
|                | Vilaflor          | 42  | 404            | 6   | 5   | 0,65 (0,047)   | 0,00554      | 0,00348    | 1,5645 <sup>n.s.</sup>  | 0,3564 <sup>n.s.</sup>  | 0,8557 <sup>n.s.</sup>  | 2,224      | 1.000 <sup>n.s.</sup> |
|                | Overall           | 374 | 404            | 10  | 12  | 0,64 (0,016)   | 0,00490      | 0,00386    | 0,607 <sup>n.s.</sup>   | -0,3807 <sup>n.s.</sup> | -0,0172 <sup>n.s.</sup> | -0,416     | 0.933 <sup>n.s.</sup> |
| <i>cad</i>     | Esperanza         | 48  | 412            | 8   | 9   | 0,719 (0,054)  | 0,00241      | 0,00407    | -1,1123 <sup>n.s.</sup> | -1,5273 <sup>n.s.</sup> | -1,6384 <sup>n.s.</sup> | -3,879     | 1.000 <sup>n.s.</sup> |
|                | Taburiente        | 48  | 412            | 7   | 9   | 0,638 (0,072)  | 0,00251      | 0,00356    | -0,7783 <sup>n.s.</sup> | -0,3006 <sup>n.s.</sup> | -0,5312 <sup>n.s.</sup> | -3,689     | 1.000 <sup>n.s.</sup> |
|                | Guancha           | 48  | 412            | 6   | 8   | 0,733 (0,046)  | 0,00248      | 0,00305    | -0,4731 <sup>n.s.</sup> | -0,5283 <sup>n.s.</sup> | -0,5987 <sup>n.s.</sup> | -2,671     | 1.000 <sup>n.s.</sup> |
|                | Garafía           | 48  | 412            | 3   | 4   | 0,352 (0,078)  | 0,00082      | 0,00152    | -0,9533 <sup>n.s.</sup> | -1,6996 <sup>n.s.</sup> | -1,7176 <sup>n.s.</sup> | -1,574     | 1.000 <sup>n.s.</sup> |
|                | El Hierro         | 48  | 412            | 2   | 3   | 0,462 (0,073)  | 0,00112      | 0,00101    | 0,2044 <sup>n.s.</sup>  | 0,7515 <sup>n.s.</sup>  | 0,6853 <sup>n.s.</sup>  | 0,36       | 1.000 <sup>n.s.</sup> |
|                | Mogán             | 48  | 412            | 5   | 6   | 0,731 (0,049)  | 0,00256      | 0,00254    | 0,0291 <sup>n.s.</sup>  | 1,1004 <sup>n.s.</sup>  | 0,8982 <sup>n.s.</sup>  | -0,688     | 1.000 <sup>n.s.</sup> |
|                | Tirma             | 48  | 412            | 5   | 7   | 0,715 (0,049)  | 0,00221      | 0,00254    | -0,3055 <sup>n.s.</sup> | 1,1004 <sup>n.s.</sup>  | 0,7766 <sup>n.s.</sup>  | -2,085     | 1.000 <sup>n.s.</sup> |
|                | Vilaflor          | 48  | 412            | 5   | 6   | 0,647 (0,053)  | 0,00278      | 0,00254    | 0,2388 <sup>n.s.</sup>  | 0,144 <sup>n.s.</sup>   | 0,2029 <sup>n.s.</sup>  | -0,444     | 1.000 <sup>n.s.</sup> |
|                | Overall           | 384 | 412            | 11  | 18  | 0,681 (0,023)  | 0,00227      | 0,00382    | -0,8878 <sup>n.s.</sup> | -1,8285 <sup>n.s.</sup> | -1,78 <sup>n.s.</sup>   | -10,71     | 1.000 <sup>n.s.</sup> |
| <i>CCoAOMT</i> | Esperanza         | 48  | 511            | 5   | 4   | 0,453 (0,070)  | 0,00273      | 0,0022     | 0,5696 <sup>n.s.</sup>  | 0,144 <sup>n.s.</sup>   | 0,323 <sup>n.s.</sup>   | 1,821      | 0.596 <sup>n.s.</sup> |
|                | Taburiente        | 48  | 511            | 6   | 5   | 0,579 (0,056)  | 0,00337      | 0,00266    | 0,6851 <sup>n.s.</sup>  | -0,5283 <sup>n.s.</sup> | -0,1719 <sup>n.s.</sup> | 1,466      | 0.809 <sup>n.s.</sup> |
|                | Guancha           | 48  | 511            | 5   | 4   | 0,563 (0,067)  | 0,00334      | 0,00222    | 1,239 <sup>n.s.</sup>   | 1,1004 <sup>n.s.</sup>  | 1,3375 <sup>n.s.</sup>  | 2,532      | 0.681 <sup>n.s.</sup> |
|                | Garafía           | 48  | 511            | 5   | 4   | 0,605 (0,043)  | 0,00346      | 0,0022     | 1,3775 <sup>n.s.</sup>  | 0,144 <sup>n.s.</sup>   | 0,6164 <sup>n.s.</sup>  | 2,675      | 0.979 <sup>n.s.</sup> |
|                | El Hierro         | 48  | 511            | 5   | 4   | 0,198 (0,076)  | 0,00102      | 0,00222    | -1,3115 <sup>n.s.</sup> | 1,1004 <sup>n.s.</sup>  | 0,4114 <sup>n.s.</sup>  | -0,759     | 0.128 <sup>n.s.</sup> |
|                | Mogán             | 48  | 511            | 5   | 4   | 0,49 (0,063)   | 0,00283      | 0,00222    | 0,6793 <sup>n.s.</sup>  | 0,144 <sup>n.s.</sup>   | 0,3628 <sup>n.s.</sup>  | 1,94       | 0.638 <sup>n.s.</sup> |
|                | Tirma             | 48  | 511            | 5   | 4   | 0,57 (0,034)   | 0,00325      | 0,00222    | 1,1409 <sup>n.s.</sup>  | 0,144 <sup>n.s.</sup>   | 0,5304 <sup>n.s.</sup>  | 2,43       | 0.979 <sup>n.s.</sup> |
|                | Vilaflor          | 46  | 511            | 7   | 8   | 0,74 (0,043)   | 0,00398      | 0,00314    | 0,7253 <sup>n.s.</sup>  | -0,2848 <sup>n.s.</sup> | 0,0412 <sup>n.s.</sup>  | -0,511     | 0.844 <sup>n.s.</sup> |
|                | Overall           | 382 | 511            | 10  | 13  | 0,556 (0,022)  | 0,00316      | 0,00334    | -0,1061 <sup>n.s.</sup> | -0,2443 <sup>n.s.</sup> | -0,2321 <sup>n.s.</sup> | -1,981     | 0.693 <sup>n.s.</sup> |

## References

Nei M. 1987. *Molecular Evolutionary Genetics*. Columbia University Press, New York.

Watterson GA. 1975. On the number of segregating sites in genetical models without recombination. *Theoretical Population Biology* **7**: 256–276.
